# Supplementary material
Source: HighWire-hosted journal article supplement (https://bmjopen.bmj.com/content/7/11/e018993)
Supplement: inline-supplementary-material-1 [file inline-supplementary-material-1.pdf]

### **Appendix 3. Sample Data Extraction Form.**

#### **Bibliographic Information**

|                        |                            |                      |                    |
|------------------------|----------------------------|----------------------|--------------------|
| <b>Study ID:</b>       | <b>Date of extraction:</b> | <b>Extracted by:</b> | <b>Checked by:</b> |
| <b>Year published:</b> | <b>Country:</b>            |                      |                    |
| <b>Title:</b>          |                            |                      |                    |
| <b>Author(s):</b>      |                            |                      |                    |

#### **Study Characteristics**

|                                     |
|-------------------------------------|
| <b>Aims/purpose:</b>                |
| <b>Study design:</b>                |
| <b>Analytical methods deployed:</b> |
| <b>Study procedures:</b>            |

#### **Participants Characteristics**

|                                     |                |                                |
|-------------------------------------|----------------|--------------------------------|
| <b>Age:</b>                         | <b>Gender:</b> | <b>Sample size:</b>            |
| <b>Any disease characteristics:</b> |                | <b>Handicap/Average score:</b> |

#### **Intervention**

|                           |
|---------------------------|
| <b>Intervention Type:</b> |
| <b>Comparator:</b>        |
| <b>Setting:</b>           |

|                                   |  |
|-----------------------------------|--|
| <b>Duration:</b>                  |  |
| <b>Modifiers:</b>                 |  |
| Sex                               |  |
| Hills                             |  |
| Golf Carts/Pulling/Carrying Clubs |  |
| Age                               |  |
| Other                             |  |

## Outcomes

|                             |  |
|-----------------------------|--|
| <b>METS</b>                 |  |
| <b>Energy expenditure</b>   |  |
| <b>O<sub>2</sub> intake</b> |  |
| <b>Heart rate</b>           |  |
| <b>Steps taken</b>          |  |
| <b>Distance covered</b>     |  |
| <b>Strength</b>             |  |
| <b>Flexibility</b>          |  |
| <b>Balance</b>              |  |
| <b>Sedentary Behaviour</b>  |  |
| <b>Outcome Measures:</b>    |  |

## Results

|                      |
|----------------------|
| <b>Key findings:</b> |
| <b>Limitations:</b>  |
