# Supplementary material
Source: HighWire-hosted journal article supplement (https://bmjopen.bmj.com/content/7/11/e018993)
Supplement: inline-supplementary-material-2 [file inline-supplementary-material-2.pdf]

#### **Appendix 4. Results of phase one of the systematic electronic search.**

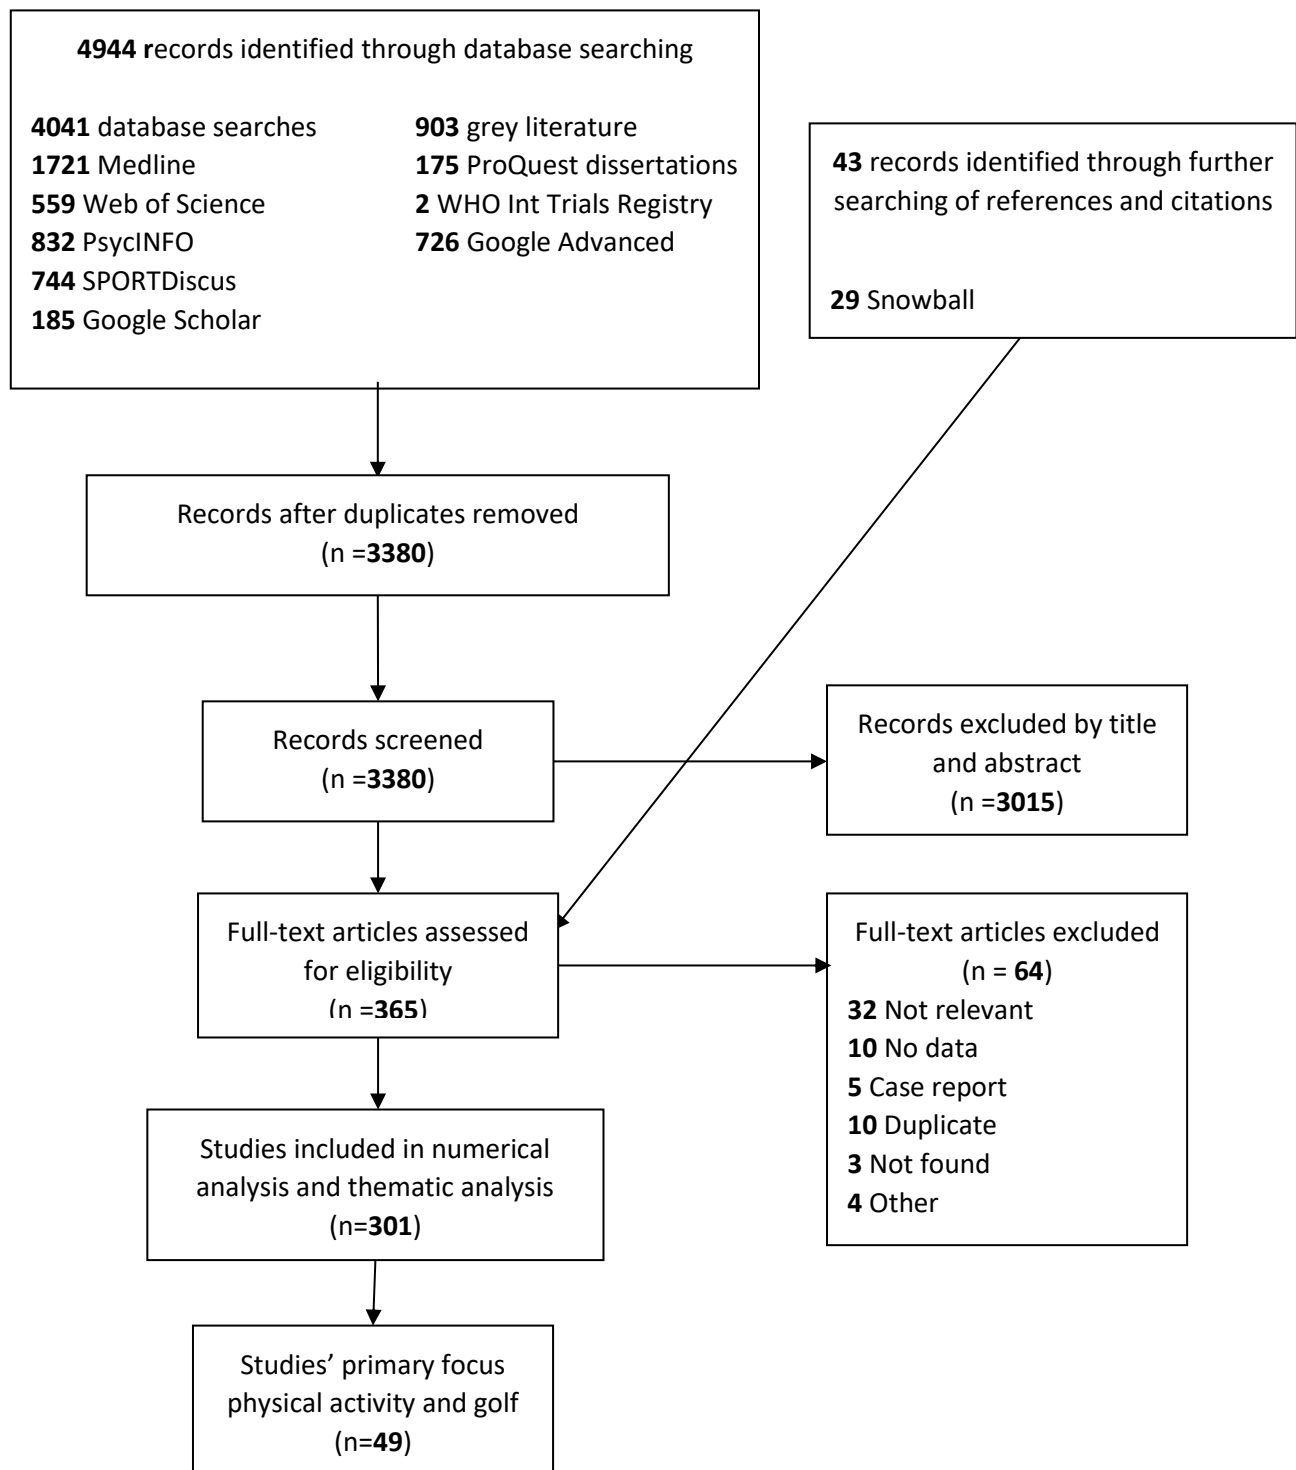

*Adapted from Murray et al.* <sup>10</sup>
