# Supplementary material
Source: HighWire-hosted journal article supplement (https://bmjopen.bmj.com/content/7/11/e018993)
Supplement: inline-supplementary-material-3 [file inline-supplementary-material-3.pdf]

## **Appendix 5. Citations of studies included in the rapid review**

1. Burkett LN, von Heijne-Fisher U. Heart rate and calorie expenditure of golfers carrying their clubs and walking flat and hilly golf courses. *International Sports Journal*. 1998;2(2):78-85.
2. Broman G, Johnsson L, Kaijser L. Golf: a high intensity interval activity for elderly men. *Aging clinical and experimental research*. 2004;16(5):375-81.
3. Crowell BG. Energy cost of participation in golf as determined by telemetry: Oklahoma State University; 1970.
4. Dear JB, Porter MM, Ready AE. Energy expenditure during golfing and lawn mowing in older adult men. *J Aging Phys Act*. 2010;18(2):185-200.
5. Dobrosielski DA, Brubaker PH, Berry MJ, Ayabe M, Miller HS. The metabolic demand of golf in patients with heart disease and in healthy adults. *J Cardiopulm Rehabil*. 2002;22(2):96-104.
6. Gabellieri JM. The physiological demands of walking during golf: University of Rhode Island; 2011.
7. Gao KL, Hui-Chan CW, Tsang WW. Golfers have better balance control and confidence than healthy controls. *Eur J Appl Physiol*. 2011;111(11):2805-12.
8. Kobriger SL, Smith J, Hollman JH, Smith AM. The contribution of golf to daily physical activity recommendations: how many steps does it take to complete a round of golf? *Mayo Clin Proc*. 2006;81(8):1041-3.
9. Kras J, Larsen B. A comparison of the health benefits of walking and riding during a round of golf. *International Sports Journal*. 2002;6(1):112-6.
10. Lampley JH, Lampley PM, Howley ET. Caloric cost of playing golf. *Res Q*. 1977;48(3):637-9.
11. Loy SF. The effect of the game of golf on cardiopulmonary fitness of middle-aged men: California State University, Northridge; 1979.
12. Sell TC, Tsai YS, Smoliga JM, Myers JB, Lephart SM. Strength, flexibility, and balance characteristics of highly proficient golfers. *J Strength Cond Res*. 2007;21(4):1166-71.
13. Stauch M, Liu Y, Giesler M, Lehmann M. Physical activity level during a round of golf on a hilly course. *The Journal of sports medicine and physical fitness*. 1999;39(4):321-7.
14. Tsang WW, Hui-Chan CW. Effects of exercise on joint sense and balance in elderly men: Tai Chi versus golf. *Medicine and science in sports and exercise*. 2004;36(4):658-67.
15. Tsang WW, Hui-Chan CW. Static and dynamic balance control in older golfers. *J Aging Phys Act*. 2010;18(1):1-13.

16. Unverdorben M, Kolb M, Bauer I, Bauer U, Brune M, Benes K, et al. Cardiovascular load of competitive golf in cardiac patients and healthy controls. *Medicine and science in sports and exercise*. 2000;32(10):1674-8.
17. Zunzer SC, von Duvillard SP, Tschakert G, Mangus B, Hofmann P. Energy expenditure and sex differences of golf playing. *Journal of sports sciences*. 2013;31(10):1045-53.
18. Tangen JO, Sunde A, Sageie J, Hagen PC, Kristoffersen B, Istad R, et al. In accordance with governmental recommendations—a study of golf and health. *Journal of sports sciences*. 2013;1:15-25.
19. Schachten T, Jansen P. The effects of golf training in patients with stroke: a pilot study. *Int Psychogeriatr*. 2015;27(5):865-73.
