# Supplementary material
Source: HighWire-hosted journal article supplement (https://bmjopen.bmj.com/content/7/11/e018993)
Supplement: inline-supplementary-material-4 [file inline-supplementary-material-4.pdf]

## **Appendix 6. Characteristics of included studies**

| <b>Study ID</b> | <b>Author, publication year</b> | <b>Country</b> | <b>Sample size</b> | <b>Participants' age (mean years)</b>  | <b>Participants' gender (% Male)</b> | <b>Participants' handicap or average score (mean strokes)</b> | <b>Participant's disease characteristics</b>                                                                                  | <b>Duration</b> | <b>Modifiers</b>               | <b>Relevant outcome measures</b>                                      |
|-----------------|---------------------------------|----------------|--------------------|----------------------------------------|--------------------------------------|---------------------------------------------------------------|-------------------------------------------------------------------------------------------------------------------------------|-----------------|--------------------------------|-----------------------------------------------------------------------|
| 1               | Burkett, 1998                   | USA            | 10                 | 24.0                                   | 100                                  | <80 <sup>+</sup> (50%)<br>80-95 <sup>+</sup> (50%)            | Healthy                                                                                                                       | 3 x 18 holes    | Course profile; skill level    | Energy expenditure; heart rate                                        |
| 3               | Broman, 2004                    | Sweden         | 19                 | 27.0 (31%)<br>50.0 (37%)<br>75.0 (31%) | 100                                  | NR                                                            | 1 x Polymyalgia rheumatica; 7 x "back problems"; 2 x knee pain                                                                | 18 holes        | Age; areas of golf course      | Heart rate                                                            |
| 4               | Crowell, 1970                   | USA            | 7                  | 42.7                                   | 100                                  | 11.6                                                          | NR                                                                                                                            | 3 x 9 holes     | Club transportation; shot type | Energy expenditure; oxygen intake; heart rate; distance covered       |
| 7               | Dear, 2010                      | USA            | 18                 | 71.2                                   | 100                                  | NR                                                            | Healthy                                                                                                                       | 9 holes         | -                              | METs; energy expenditure; oxygen intake; heart rate; distance covered |
| 8               | Dobrosielski, 2002              | USA            | 20                 | 63.6 (50%)<br>65.8 (50%)               | 100                                  | NR                                                            | 2 x myocardial infarction<br>4 x coronary artery bypass graft<br>2 x percutaneous coronary intervention<br>1 x cardiomyopathy | 9 holes         | Heart disease                  | METs; energy expenditure                                              |

|    |                   |         |     |                                                              |      |                                            |                                                                       |              |                                     |                                                                     |
|----|-------------------|---------|-----|--------------------------------------------------------------|------|--------------------------------------------|-----------------------------------------------------------------------|--------------|-------------------------------------|---------------------------------------------------------------------|
| 11 | Gabellieri, 2011  | USA     | 13  | 28.5                                                         | 100  | 97.1 <sup>†</sup>                          | NR                                                                    | 18 holes     | Weight                              | METs; energy expenditure; heart rate; steps taken; distance covered |
| 12 | Gao, 2011         | China   | 23  | 66.2 (47.8%)<br>71.3 (52.2%)                                 | 100  | NR                                         | Healthy                                                               | NA           | -                                   | Balance                                                             |
| 24 | Kobriger, 2006    | USA     | 42  | 55                                                           | 28.6 | NR                                         | NR                                                                    | 3 x 18 holes | Sex                                 | Steps taken                                                         |
| 25 | Kras, 2002        | USA     | 12  | 42-57                                                        | 100  | 7-21                                       | NR                                                                    | 3 x 9 holes  | Course profile, club transportation | Heart rate                                                          |
| 26 | Lamley, 1977      | USA     | 22  | 34 (50%)<br>32 (50%)                                         | 50   | 19                                         | NR                                                                    | 9 holes      | Sex                                 | Energy expenditure                                                  |
| 27 | Loy, 1979         | USA     | 6   | 52.5                                                         | 100  | 15.7                                       | Healthy                                                               | 18 holes     | -                                   | Energy expenditure; oxygen intake; heart rate                       |
| 34 | Sell, 2008        | USA     | 257 | 45.5                                                         | 100  | <0 (17.5%)<br>0-9 (46.7%)<br>10-20 (35.8%) | NR                                                                    | NA           | Skill level                         | Strength; balance; flexibility                                      |
| 35 | Stauch, 2003      | USA     | 30  | 53                                                           | 70   | 29                                         | 9 x cardiovascular disease                                            | 18 holes     | Course profile; sex                 | Heart rate                                                          |
| 37 | Tsang, 2004       | China   | 35  | 69.6 (34.3%)<br>66.2 (31.4%)<br>71.3 (34.3%)<br>20.3 (34.3%) | 100  | NR                                         | NR                                                                    | NA           | -                                   | Balance                                                             |
| 38 | Tsang, 2010       | China   | 23  | 66.2 (47.8%)<br>71.3 (52.2%)                                 | 100  | NR                                         | NR                                                                    | NA           | -                                   | Balance                                                             |
| 39 | Unverdorben, 2000 | Germany | 28  | 65.3 (71.4%)<br>62.0 (28.6%)                                 | 100  | NR                                         | 11 x coronary artery disease;<br>10 x post myocardial infarction; 2 x | 18 holes     | Heart disease                       | METs; oxygen intake; heart rate                                     |

|    |                |         |    |                          |      |                              |                                                                                                                                            |                                     |                                               |                                                                     |
|----|----------------|---------|----|--------------------------|------|------------------------------|--------------------------------------------------------------------------------------------------------------------------------------------|-------------------------------------|-----------------------------------------------|---------------------------------------------------------------------|
|    |                |         |    |                          |      |                              | peripheral arterial occlusive disease; 14 x arrhythmias; 1 x post-myocarditis; 2 x valve disease; 1 x diabetes mellitus; 12 x hypertension |                                     |                                               |                                                                     |
| 41 | Zunzer, 2013   | Austria | 66 | 53.3                     | 63.6 | 26.4 (51.5%)<br>20.4 (48.5%) | NR                                                                                                                                         | 9 holes or 18 holes                 | Sex; course profile; club transportation; age | METs; energy expenditure; heart rate; distance covered              |
| 49 | Tangen, 2013   | Norway  | 29 | 44.2                     | 48.3 | 27.3                         | NR                                                                                                                                         | 18 holes                            | Sex; course profile; age; skill level         | METs; energy expenditure; heart rate; steps taken; distance covered |
| 50 | Schachen, 2015 | Germany | 14 | 55.1 (50%)<br>53.1 (50%) | NR   | NR                           | Stroke                                                                                                                                     | 10 weeks (2 putting session/w week) | -                                             | Balance                                                             |

NR: Not reported

NA: not applicable

\*calculated

<sup>†</sup> average score
