# Supplementary material
Source: HighWire-hosted journal article supplement (https://bmjopen.bmj.com/content/7/11/e018993)
Supplement: inline-supplementary-material-5 [file inline-supplementary-material-5.pdf]

## Appendix 7. Quality assessment of included studies.

| Author, year       | Clear objective | Clearly defined study population | Participation rate of eligible persons >50% | Recruited from same or similar populations + inclusion and exclusion criteria prespecified | Sample size justification, power description, or variance and effect estimates | Exposures measured prior to outcome being measured | Sufficient timeframe | Different levels of exposure examined | Exposure measures clearly defined, valid, reliable and implemented consistently | Exposure assessed more than once over time | Outcome measures clearly defined, valid, reliable and implemented consistently | Outcome assessors blinded to exposure status | Loss to follow-up <20% | Key confounding variables measured and adjusted for | Overall Rating |
|--------------------|-----------------|----------------------------------|---------------------------------------------|--------------------------------------------------------------------------------------------|--------------------------------------------------------------------------------|----------------------------------------------------|----------------------|---------------------------------------|---------------------------------------------------------------------------------|--------------------------------------------|--------------------------------------------------------------------------------|----------------------------------------------|------------------------|-----------------------------------------------------|----------------|
| Burkett, 1998      | Y               | N                                | NA                                          | CD                                                                                         | N                                                                              | NA                                                 | Y                    | Y                                     | N                                                                               | NA                                         | Y                                                                              | CD                                           | NA                     | N                                                   | Fair           |
| Broman, 2004       | Y               | Y                                | NA                                          | Y                                                                                          | N                                                                              | NA                                                 | Y                    | N                                     | N                                                                               | NA                                         | Y                                                                              | NA                                           | NA                     | N                                                   | Fair           |
| Crowell, 1970      | Y               | Y                                | NA                                          | N                                                                                          | N                                                                              | NA                                                 | Y                    | Y                                     | Y                                                                               | NA                                         | Y                                                                              | CD                                           | NA                     | Y                                                   | Fair           |
| Dear, 2010         | Y               | Y                                | NA                                          | Y                                                                                          | N                                                                              | NA                                                 | Y                    | N                                     | N                                                                               | NA                                         | Y                                                                              | CD                                           | NA                     | N                                                   | Fair           |
| Dobrosielski, 2002 | Y               | Y                                | NA                                          | N                                                                                          | N                                                                              | NA                                                 | Y                    | N                                     | N                                                                               | NA                                         | Y                                                                              | CD                                           | NA                     | N                                                   | Fair           |
| Gabellieri, 2011   | Y               | N                                | NA                                          | CD                                                                                         | Y                                                                              | NA                                                 | Y                    | N                                     | Y                                                                               | N                                          | Y                                                                              | NA                                           | NA                     | N                                                   | Fair           |
| Gao, 2011          | Y               | Y                                | NA                                          | Y                                                                                          | Y                                                                              | NA                                                 | Y                    | N                                     | Y                                                                               | NA                                         | Y                                                                              | CD                                           | NA                     | Y                                                   | Good           |
| Kobriger, 2006     | Y               | N                                | NA                                          | Y                                                                                          | Y                                                                              | NA                                                 | Y                    | Y                                     | N                                                                               | N                                          | Y                                                                              | NA                                           | NA                     | N                                                   | Fair           |
| Kras, 2002         | Y               | N                                | NA                                          | CD                                                                                         | Y                                                                              | NA                                                 | Y                    | Y                                     | Y                                                                               | N                                          | Y                                                                              | CD                                           | NA                     | N                                                   | Fair           |
| Lampley, 1977      | Y               | N                                | NA                                          | CD                                                                                         | N                                                                              | NA                                                 | Y                    | N                                     | N                                                                               | N                                          | Y                                                                              | NA                                           | NA                     | Y                                                   | Fair           |
| Loy, 1979          | Y               | Y                                | NA                                          | N                                                                                          | N                                                                              | NA                                                 | Y                    | N                                     | N                                                                               | N                                          | Y                                                                              | NA                                           | NA                     | N                                                   | Fair           |
| Sell, 2008         | Y               | N                                | NA                                          | CD                                                                                         | N                                                                              | Y                                                  | CD                   | Y                                     | Y                                                                               | NA                                         | Y                                                                              | CD                                           | NA                     | N                                                   | Good           |
| Stauch, 2003       | Y               | Y                                | NA                                          | N                                                                                          | N                                                                              | NA                                                 | Y                    | Y                                     | Y                                                                               | NA                                         | Y                                                                              | NA                                           | NA                     | N                                                   | Fair           |
| Tsang, 2004        | Y               | N                                | NA                                          | N                                                                                          | N                                                                              | Y                                                  | Y                    | N                                     | Y                                                                               | N                                          | Y                                                                              | CD                                           | NA                     | Y                                                   | Fair           |

|                   |   |   |    |    |   |    |   |   |   |    |   |    |    |   |             |
|-------------------|---|---|----|----|---|----|---|---|---|----|---|----|----|---|-------------|
| Tsang, 2010       | Y | Y | NA | Y  | N | Y  | Y | N | Y | N  | Y | CD | NA | Y | <b>Good</b> |
| Unverdorben, 2000 | Y | Y | NA | N  | N | NA | Y | N | Y | N  | Y | CD | NA | Y | <b>Good</b> |
| Zunzer, 2013      | Y | Y | NA | Y  | N | NA | Y | Y | Y | N  | Y | CD | NA | Y | <b>Good</b> |
| Tangen, 2013      | Y | N | NA | CD | N | NA | Y | Y | N | N  | Y | CD | NA | Y | <b>Fair</b> |
| Schachen, 2015    | Y | N | NA | N  | Y | NA | Y | N | Y | NA | Y | CD | NA | N | <b>Fair</b> |

*Y: yes*

*N: no*

*NA: not applicable*

*CD: can't determine*

*NR: not reported*
