# Supplementary material
Source: HighWire-hosted journal article supplement (https://bmjopen.bmj.com/content/7/11/e018993)
Supplement: inline-supplementary-material-7 [file inline-supplementary-material-7.pdf]

## **Appendix 2. Searching protocol, phase 2**

### **SPORTDiscus**

From 1900, all articles, all languages

Search for: Golf AND health

Hits: 32

### **Web of Science**

From 1900, all articles, all languages,

Search for: Golf AND health

Hits: 29

### **PsycInfo**

From 1900, all articles, all languages

Search for: Golf

Hits: 10

### **Medline**

From 1900, all articles, all languages

Search for: Golf

Hits: 91

### **Google Scholar**

From 1900, articles and patents, include citations

Search for: Golf AND health OR illness OR injury OR fitness OR mortality OR morbidity

Within title

Hits: 8
